# Supplementary material
Source: publisher site journal article supplement (https://www.dovepress.com/article/407553)
Supplement: Supplementary file 1 [file get_supplementary_file.php]

**APPENDIX**

**The Ability to Integrate Beauty Scale (AIBS)**

**(Świątek & Szcześniak, 2023)**

**Instruction**: Please read the following statements carefully and then indicate to what extend you agree with each of them. Items are rated on a 7-point Likert scale:

1 = I strongly disagree

2 = I disagree

3 = I rather disagree

4 = I neither agree nor disagree

5 = I rather agree

6 = I agree

7 = I strongly agree

| 1. Contact with beauty makes me want to be a better person.  Kontakt z pięknem sprawia, że chcę być lepszym człowiekiem. |
| --- |
| 2. Contact with beauty prompts me to reflect.  Kontakt z pięknem skłania mnie do refleksji. |
| 3. Contact with beauty makes me feel the reality that surrounds me more intensely  Kontakt z pięknem sprawia, że intensywniej doświadczam rzeczywistości, która mnie otacza. |
| 4. Thanks to experiencing true beauty, I see certain things and matter differently.  Dzięki doświadczeniu prawdziwego piękna inaczej patrzę na niektóre rzeczy i sprawy. |
| 5. Contact with beauty changed some of my attitudes and behaviors towards other people.  Kontakt z pięknem zmienił moje niektóre postawy i zachowania wobec innych ludzi. |
| 6. Contact with beauty changes my thinking of the world.  Kontakt z pięknem sprawia, że zmienia się moje myślenie o świecie. |
| 7. Experiencing beauty teaches me a new way of looking at the world.  Doświadczanie piękna uczy mnie nowego sposobu patrzenia na świat. |
